# Supplementary material for: HDAC3 Regulates the Transition to the Homeostatic Myelinating Schwann Cell State
Source: PubMed Central journal article supplement (PMC6293966; doi:10.1016/j.celrep.2018.11.045), 2018-12-04
Supplement: mmc1.pdf [file mmc1.pdf]

**Cell Reports, Volume 25**

**Supplemental Information**

**HDAC3 Regulates the Transition to the  
Homeostatic Myelinating Schwann Cell State**

**Laura H. Rosenberg, Anne-Laure Cattin, Xavier Fontana, Elizabeth Harford-Wright, Jemima J. Burden, Ian J. White, Jacob G. Smith, Ilaria Napoli, Victor Quereda, Cristina Policarpi, Jamie Freeman, Robin Ketteler, Antonella Riccio, and Alison C. Lloyd**

A

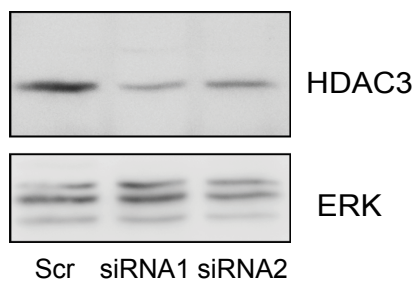

B

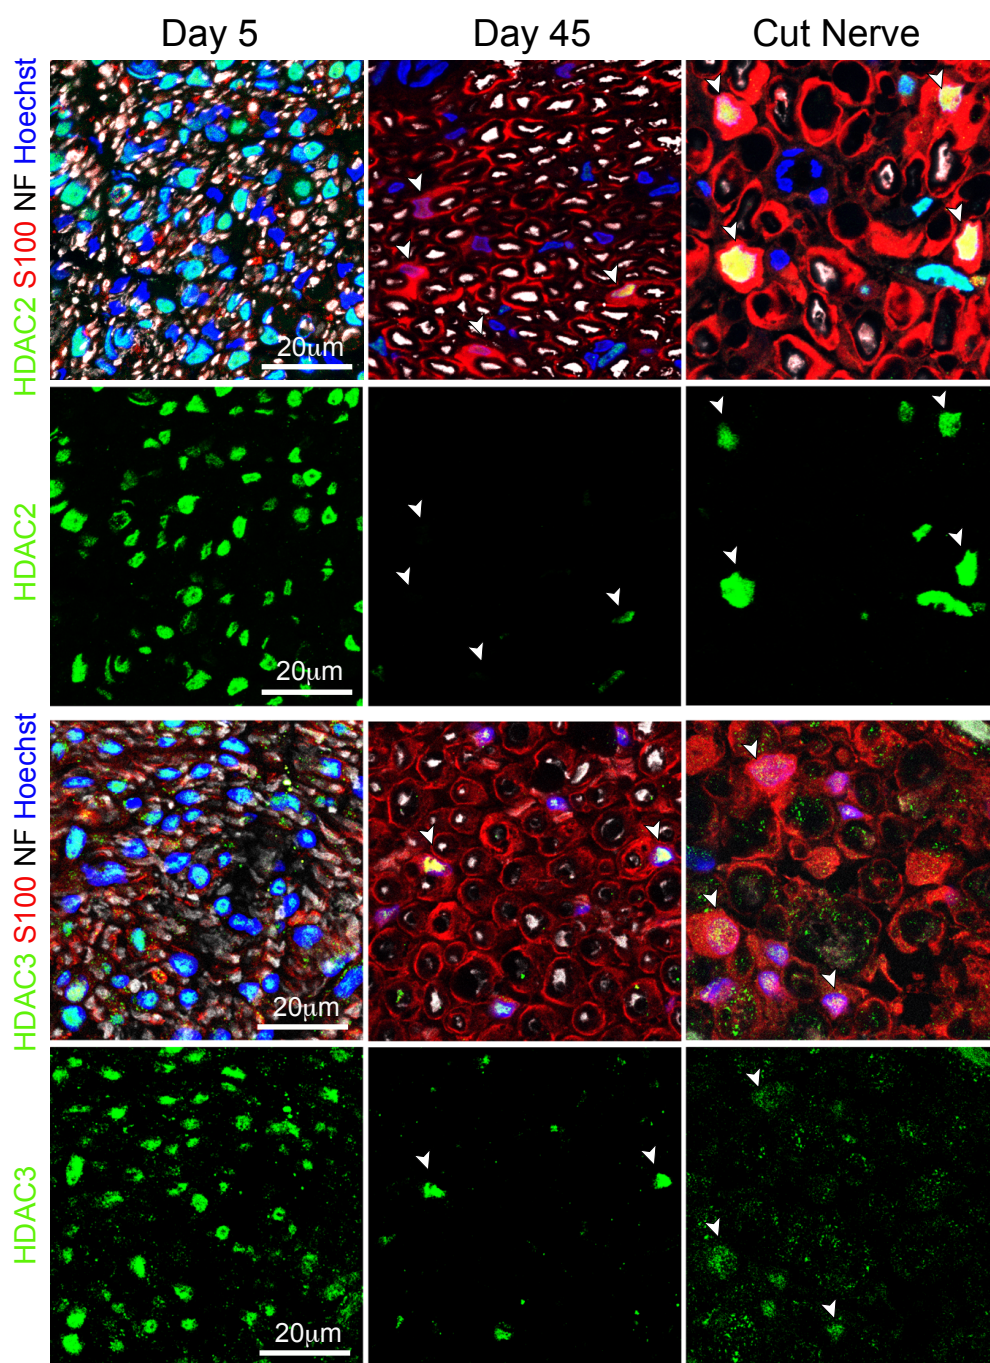

**Supplementary Figure 1. HDAC3 regulates myelin gene transcription and is expressed in adult myelinating Schwann cells, related to Figure 1.** A) Western blot analysis of total protein lysates from siRNA-treated Schwann cells showing the efficiency of HDAC3 knockdown with two independent oligos compared to scrambled control at 48 hr. Total ERK levels were used as a loading control. B) Representative confocal images of transverse sections of rat sciatic nerves at postnatal Day 5, Day 45, and Day 45 animals, 72 hours following nerve transection stained for S100 (red), neurofilament (white) and HDAC2 (top panel) or HDAC3 (lower panel) (green), as indicated. Nuclei were counterstained with Hoechst (blue). Note that similarly to mice (Figure 1D), HDAC2 expression is low in adult mSCs whereas it is reinduced upon injury (arrowheads). Conversely HDAC3 expression is maintained in adult mSCs (arrowheads) whereas it decreases upon injury (arrowheads).

**Figure S2**

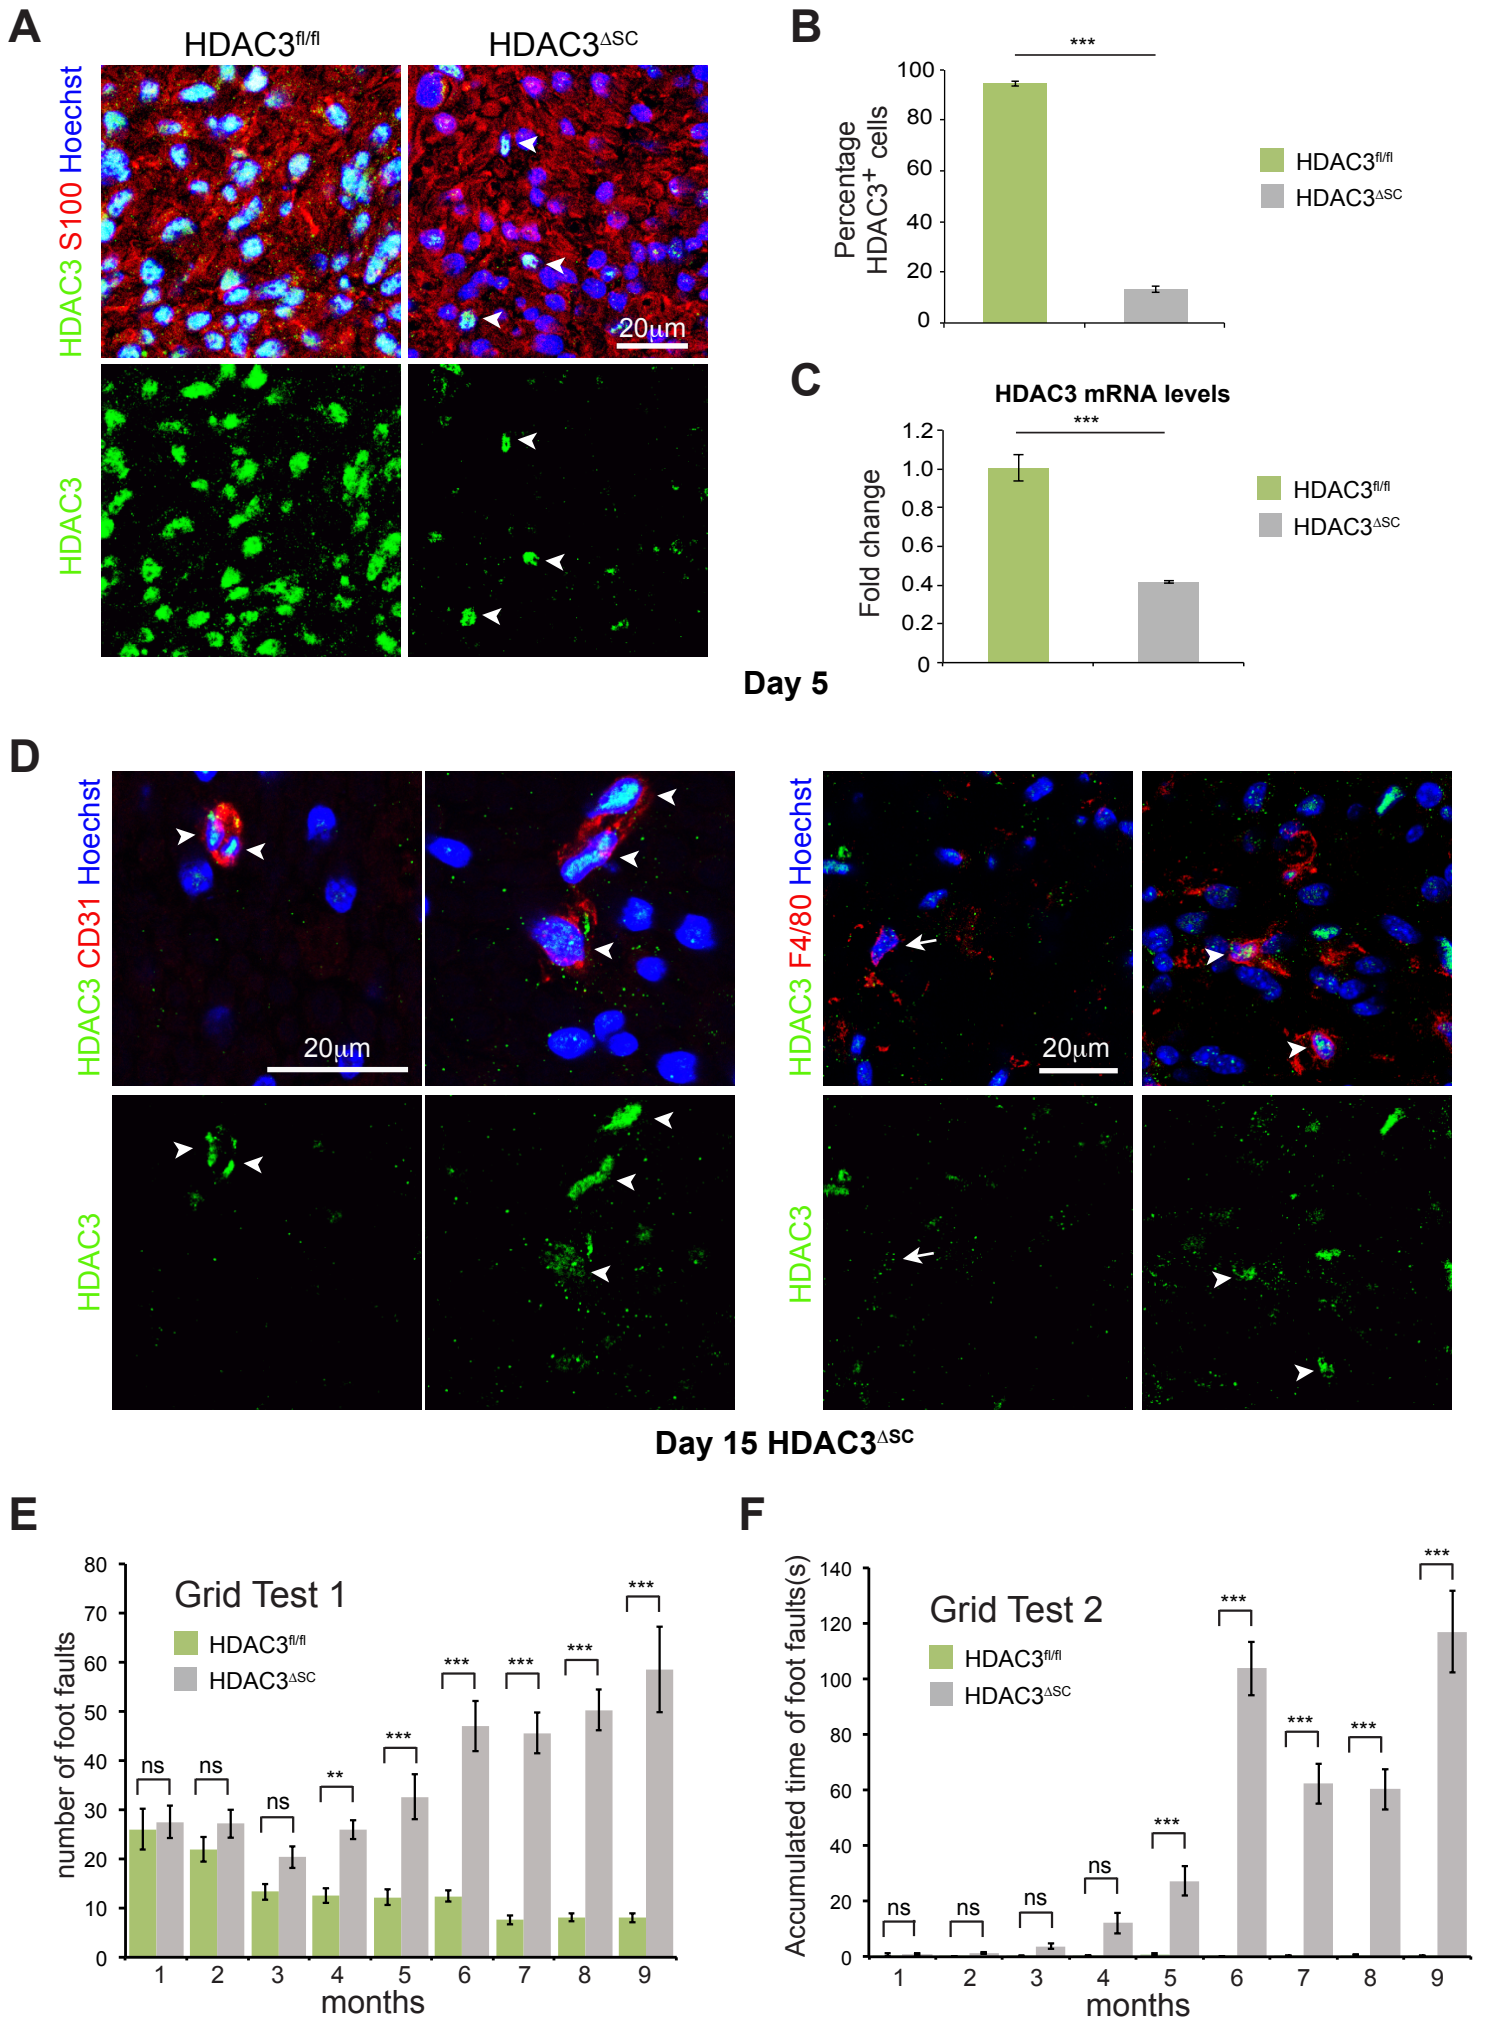

**Supplementary Figure 2. Loss of HDAC3 in Schwann cells results in progressive adult neuropathy, related to Figure 2.** A) Immunofluorescence of representative transverse sciatic nerve sections from control (HDAC3<sup>fl/fl</sup>) mice or mutant mice (HDAC3<sup>ΔSC</sup>) at postnatal Day 5 showing efficient loss of nuclear HDAC3 staining (green) in S100-labelled Schwann cells (red). Nuclei were counterstained with Hoechst (blue). Arrowheads point to other cell types that still express HDAC3 in mutant mice. B) Graph shows quantification of (A), which indicates a significant decrease of cells expressing HDAC3 in mutant compared to control mice (n=4, mean±SEM). (C) RT-qPCR analysis of HDAC3 mRNA levels in control (HDAC3<sup>fl/fl</sup>) and mutant mice (HDAC3<sup>ΔSC</sup>) at postnatal Day 5 (n=3, mean±SEM). (D) Representative confocal images of transverse sections of sciatic nerve from mutant mice (HDAC3<sup>ΔSC</sup>) at postnatal Day 15 showing HDAC3 staining (green) in endothelial cells labelled with CD31 and indicated with arrowheads (left panel) and in macrophages labelled with F4/80 (right panel) (red). Note only some macrophages are positive for HDAC3 with arrowheads marking HDAC<sup>+</sup> macrophages and an arrow indicating a HDAC<sup>-</sup> macrophage. Nuclei were counterstained with Hoechst (blue). E) and (F) Grid behavioural test showing (E) average number and (F) accumulated time of foot faults in seconds of control (HDAC3<sup>fl/fl</sup>) and mutant (HDAC3<sup>ΔSC</sup>) animals from 1-9 months after birth (n=4-19 animals/time point, mean±SEM). \*\*p<0.01, \*\*\*p<0.001.

**Movie S1, related to Figure 2. Adult HDAC3<sup>ASC</sup> mice display severe motor disabilities.**

Video showing an example of a 9 month-old mutant HDAC3<sup>ASC</sup> mouse showing symptoms consistent with an advanced neuropathy.

Figure S3

A

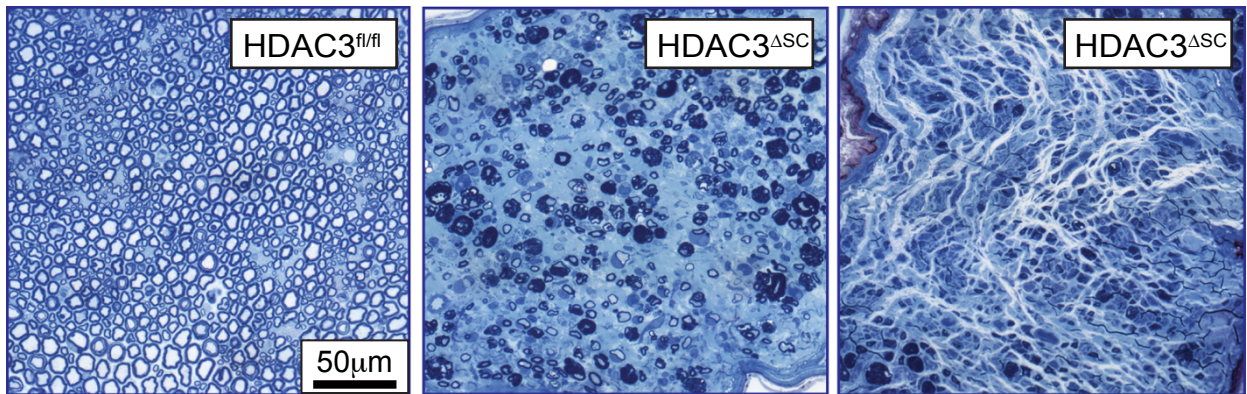

B

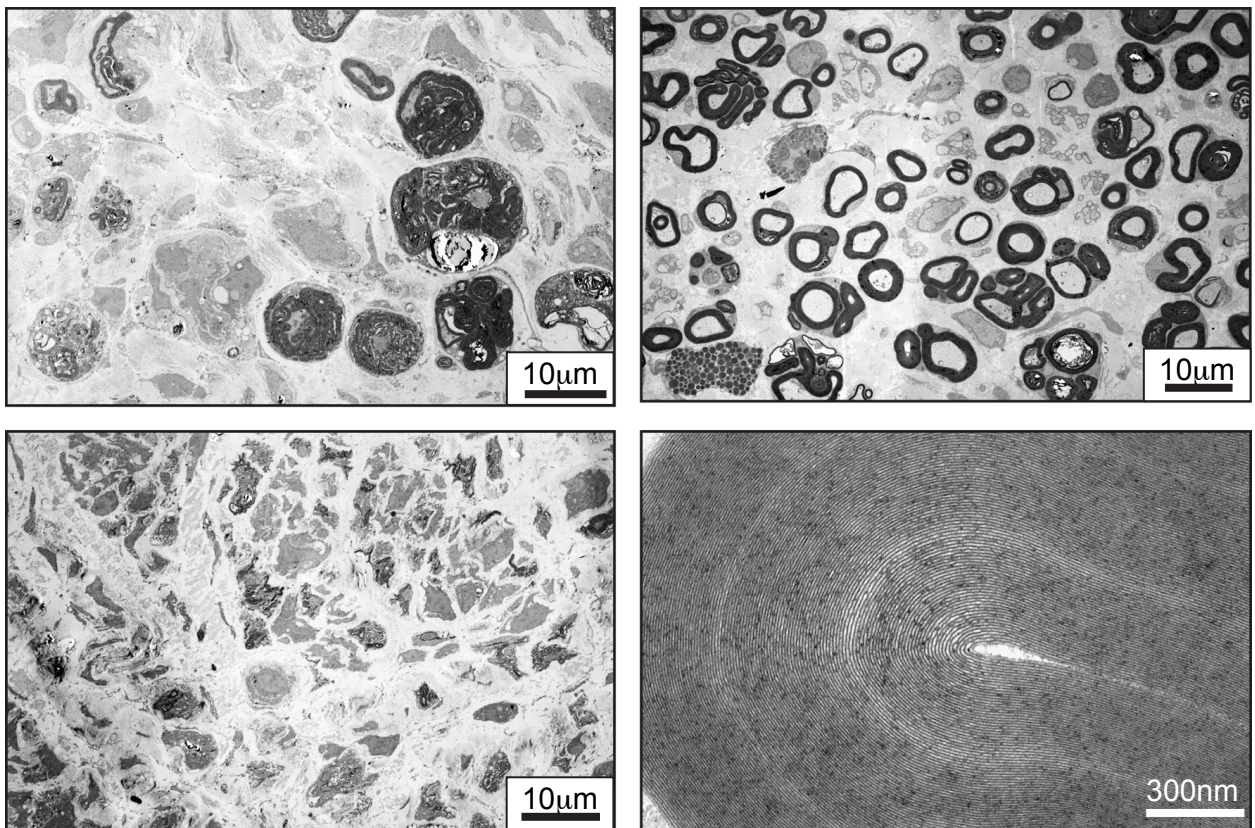

C

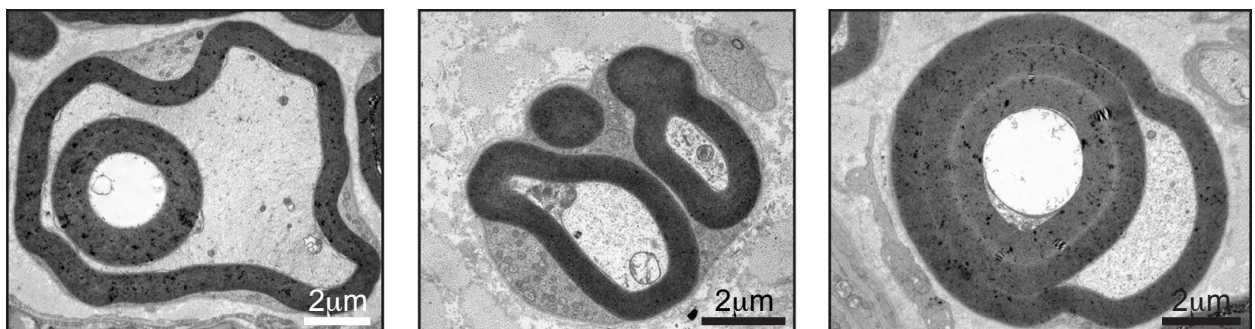

**Supplementary Figure 3. HDAC3 loss in Schwann cells results in gross myelinating abnormalities, related to Figure 3.** (A) Representative images of transverse sections of a sciatic nerve from 9 month-old control HDAC3<sup>fl/fl</sup> and mutant HDAC3<sup>ASC</sup> mice stained with toluidine blue, when the mutant animals exhibit severe neuropathies. The left image from a mutant animal shows a decrease in myelinated fibre number and myelination abnormalities, the right image shows fibrotic tissue and predominantly naked axons in more extreme cases. (B) Representative EM images of transverse ultrathin sections showing a collection of gross abnormalities in SC-axonal units in mutant HDAC3<sup>ASC</sup> mice. Left panels show examples of fibrotic tissue resulting from Schwann cell death and axonal degeneration. The top right panel illustrates abnormalities due to hypermyelination such as tomacula, outfoldings and infoldings as well as inflammatory cell recruitment. The bottom right panel shows normal structure and compaction of myelin in mutant HDAC3<sup>ASC</sup> mice. (C) High magnification EM images showing myelin infoldings (left and right panel) and outfoldings (middle panel).



A

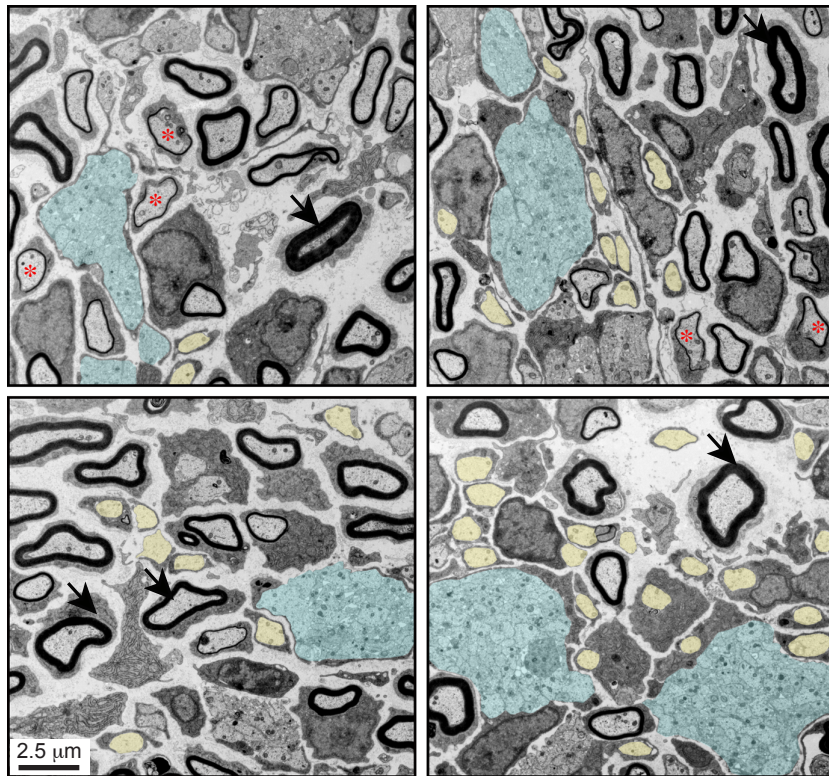

Day 5 HDAC3<sup>fl/fl</sup>

B

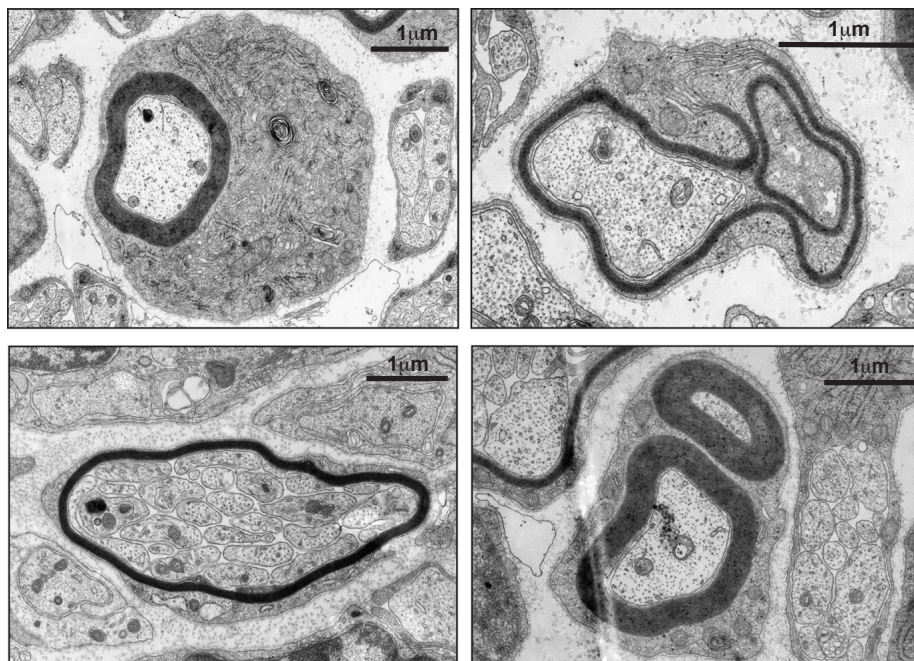

C

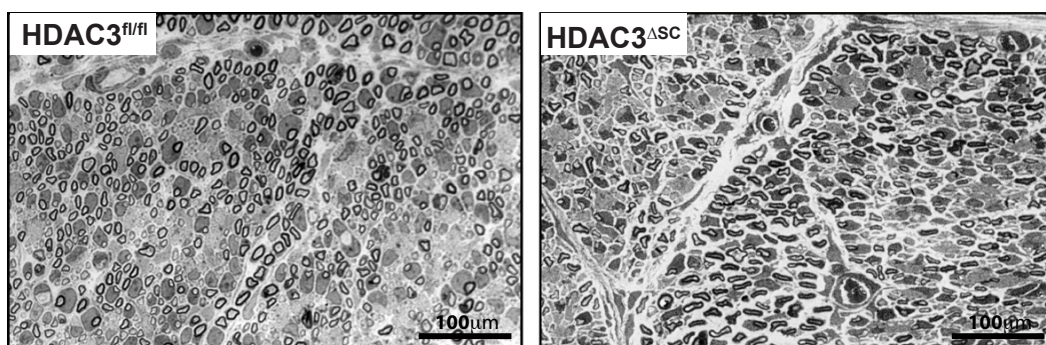

Day 5

**Supplementary Figure 4. Myelination initiates normally in Schwann cells lacking HDAC3, related to Figure 4.** (A) Representative EM images of transverse ultrathin sections of sciatic nerves from postnatal Day 5 control (HDAC3<sup>fl/fl</sup>) mice. Note that myelination is not a synchronous process: some large and small axons remain unsorted (blue), many Schwann cells have sorted axons and have associated in a 1:1 ratio, but have not yet started the myelination process (yellow), others have just started the myelination process (red \*), whereas others have nearly completed myelination (arrows). (B) High magnification EM images of a sciatic nerve from a postnatal Day 5 control HDAC3<sup>fl/fl</sup> animal showing Schwann cells myelinating normally (top left panel) or abnormally (right top and bottom panels). The bottom left panel shows a Schwann cell myelinating several small diameter axons. (C) Representative images of transverse sections of a sciatic nerve from postnatal Day 5 control HDAC3<sup>fl/fl</sup> and mutant HDAC3<sup>ΔSC</sup> animals stained with toluidine blue.

A

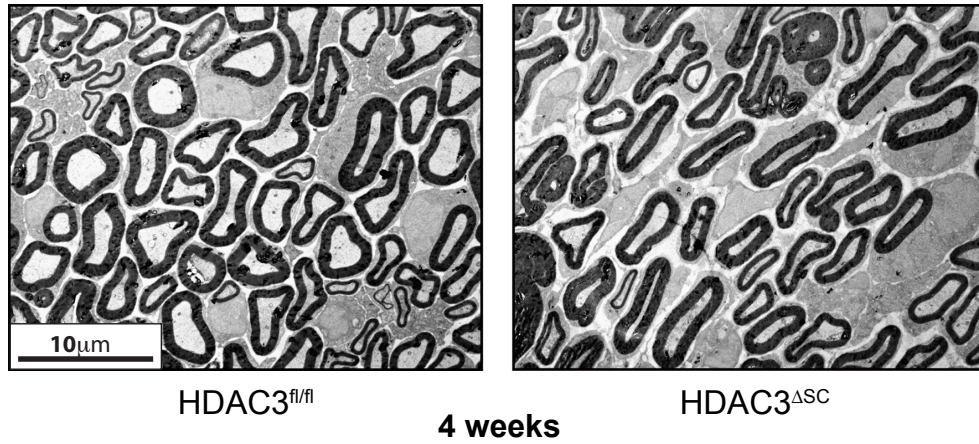

B

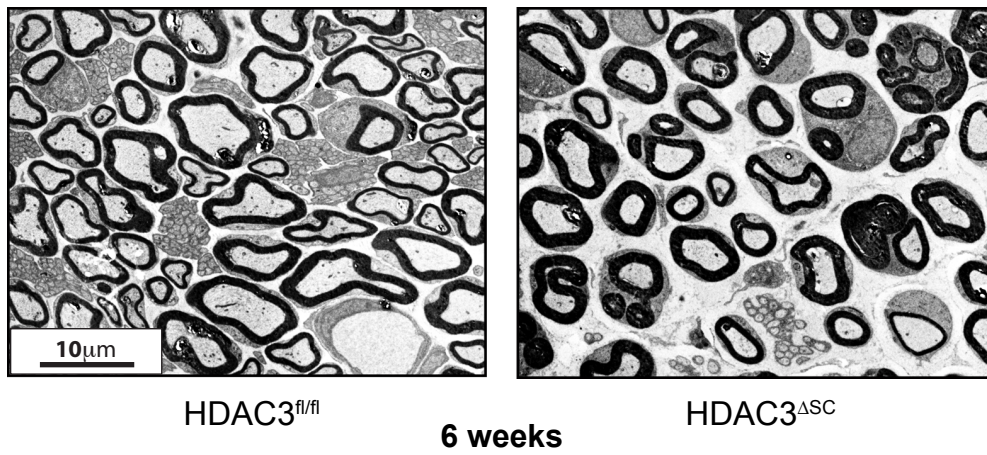

C

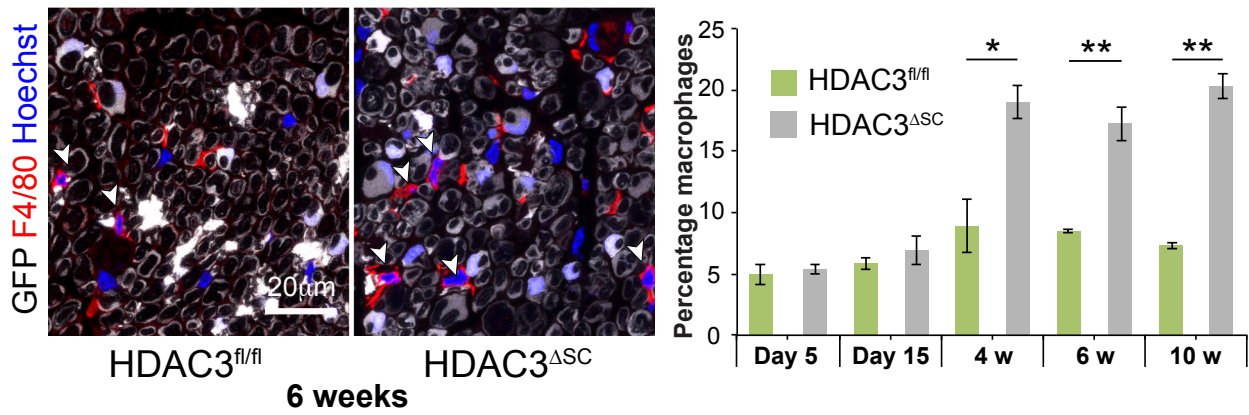

D

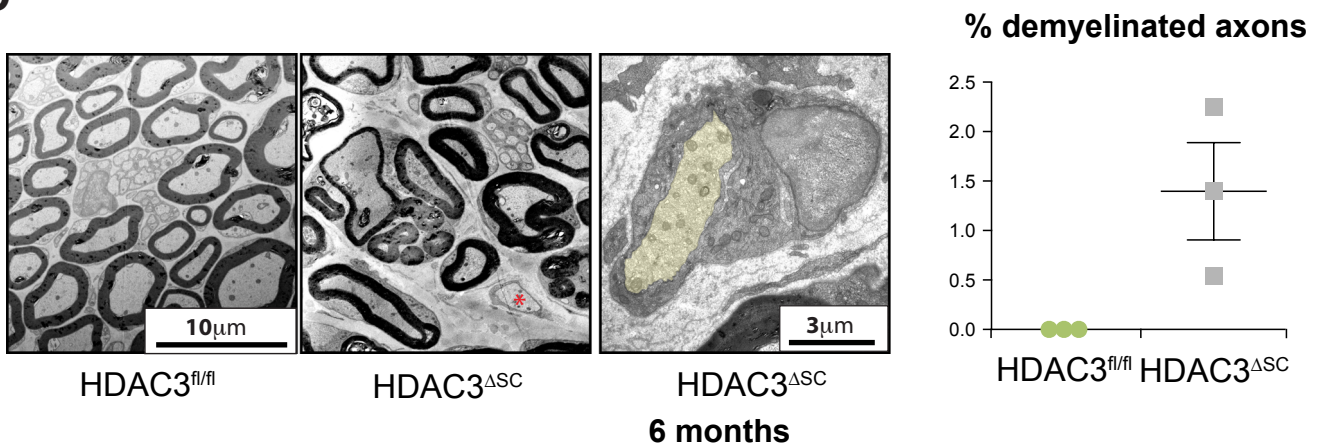

**Supplementary Figure 5. Schwann cells lacking HDAC3 fail to enter the homeostatic state, related to Figure 6.** (A) and (B) Representative EM images of transverse ultrathin sections of a sciatic nerve from 4 week (A) and 6 week (B) HDAC3<sup>fl/fl</sup> and mutant HDAC3<sup>ΔSC</sup> animals showing worsening of the phenotype overtime. C) Representative immunofluorescent images of transverse sciatic nerve sections labelled to identify macrophages (F4/80, green) and nuclei (Hoescht, blue) in plp-eGFP (SCs GFP+ in white) control (HDAC3<sup>fl/fl</sup>) and mutant mice (HDAC3<sup>ΔSC</sup>). Graph shows quantification of macrophages at indicated ages in control (HDAC3<sup>fl/fl</sup>) and mutant mice (HDAC3<sup>ΔSC</sup>) (n=3 or 4 mean±SEM). D) Representative EM images of transverse ultrathin sections of a sciatic nerve from 6 month-old control (HDAC3<sup>fl/fl</sup>) and mutant mice (HDAC3<sup>ΔSC</sup>) showing a demyelinated axon in mutant mice (HDAC3<sup>ΔSC</sup>) (red \*) (left panel), a high magnification of a demyelinated axon (yellow) found in a mutant mouse (HDAC3<sup>ΔSC</sup>) (middle panel) and the quantification of demyelinated axons at that age (n=3 mean±SEM). Note that we did not find any demyelinated axons in the control animals. \*p<0.05, \*\*p<0.01.

**Movie S2, related to Figure 5. mSCs lacking HDAC3 develop normally.** Movie shows serial EM images of entire mSCs in postnatal Day 15 control (HDAC3<sup>fl/fl</sup>) and mutant (HDAC3<sup>ASC</sup>) mice. Serial 70nm ultrathin longitudinal sections of sciatic nerves were imaged and then aligned. Black arrowheads indicate the mSCs that were used to generate the 3D-reconstructions shown in Figure 5E.

**Figure S6**

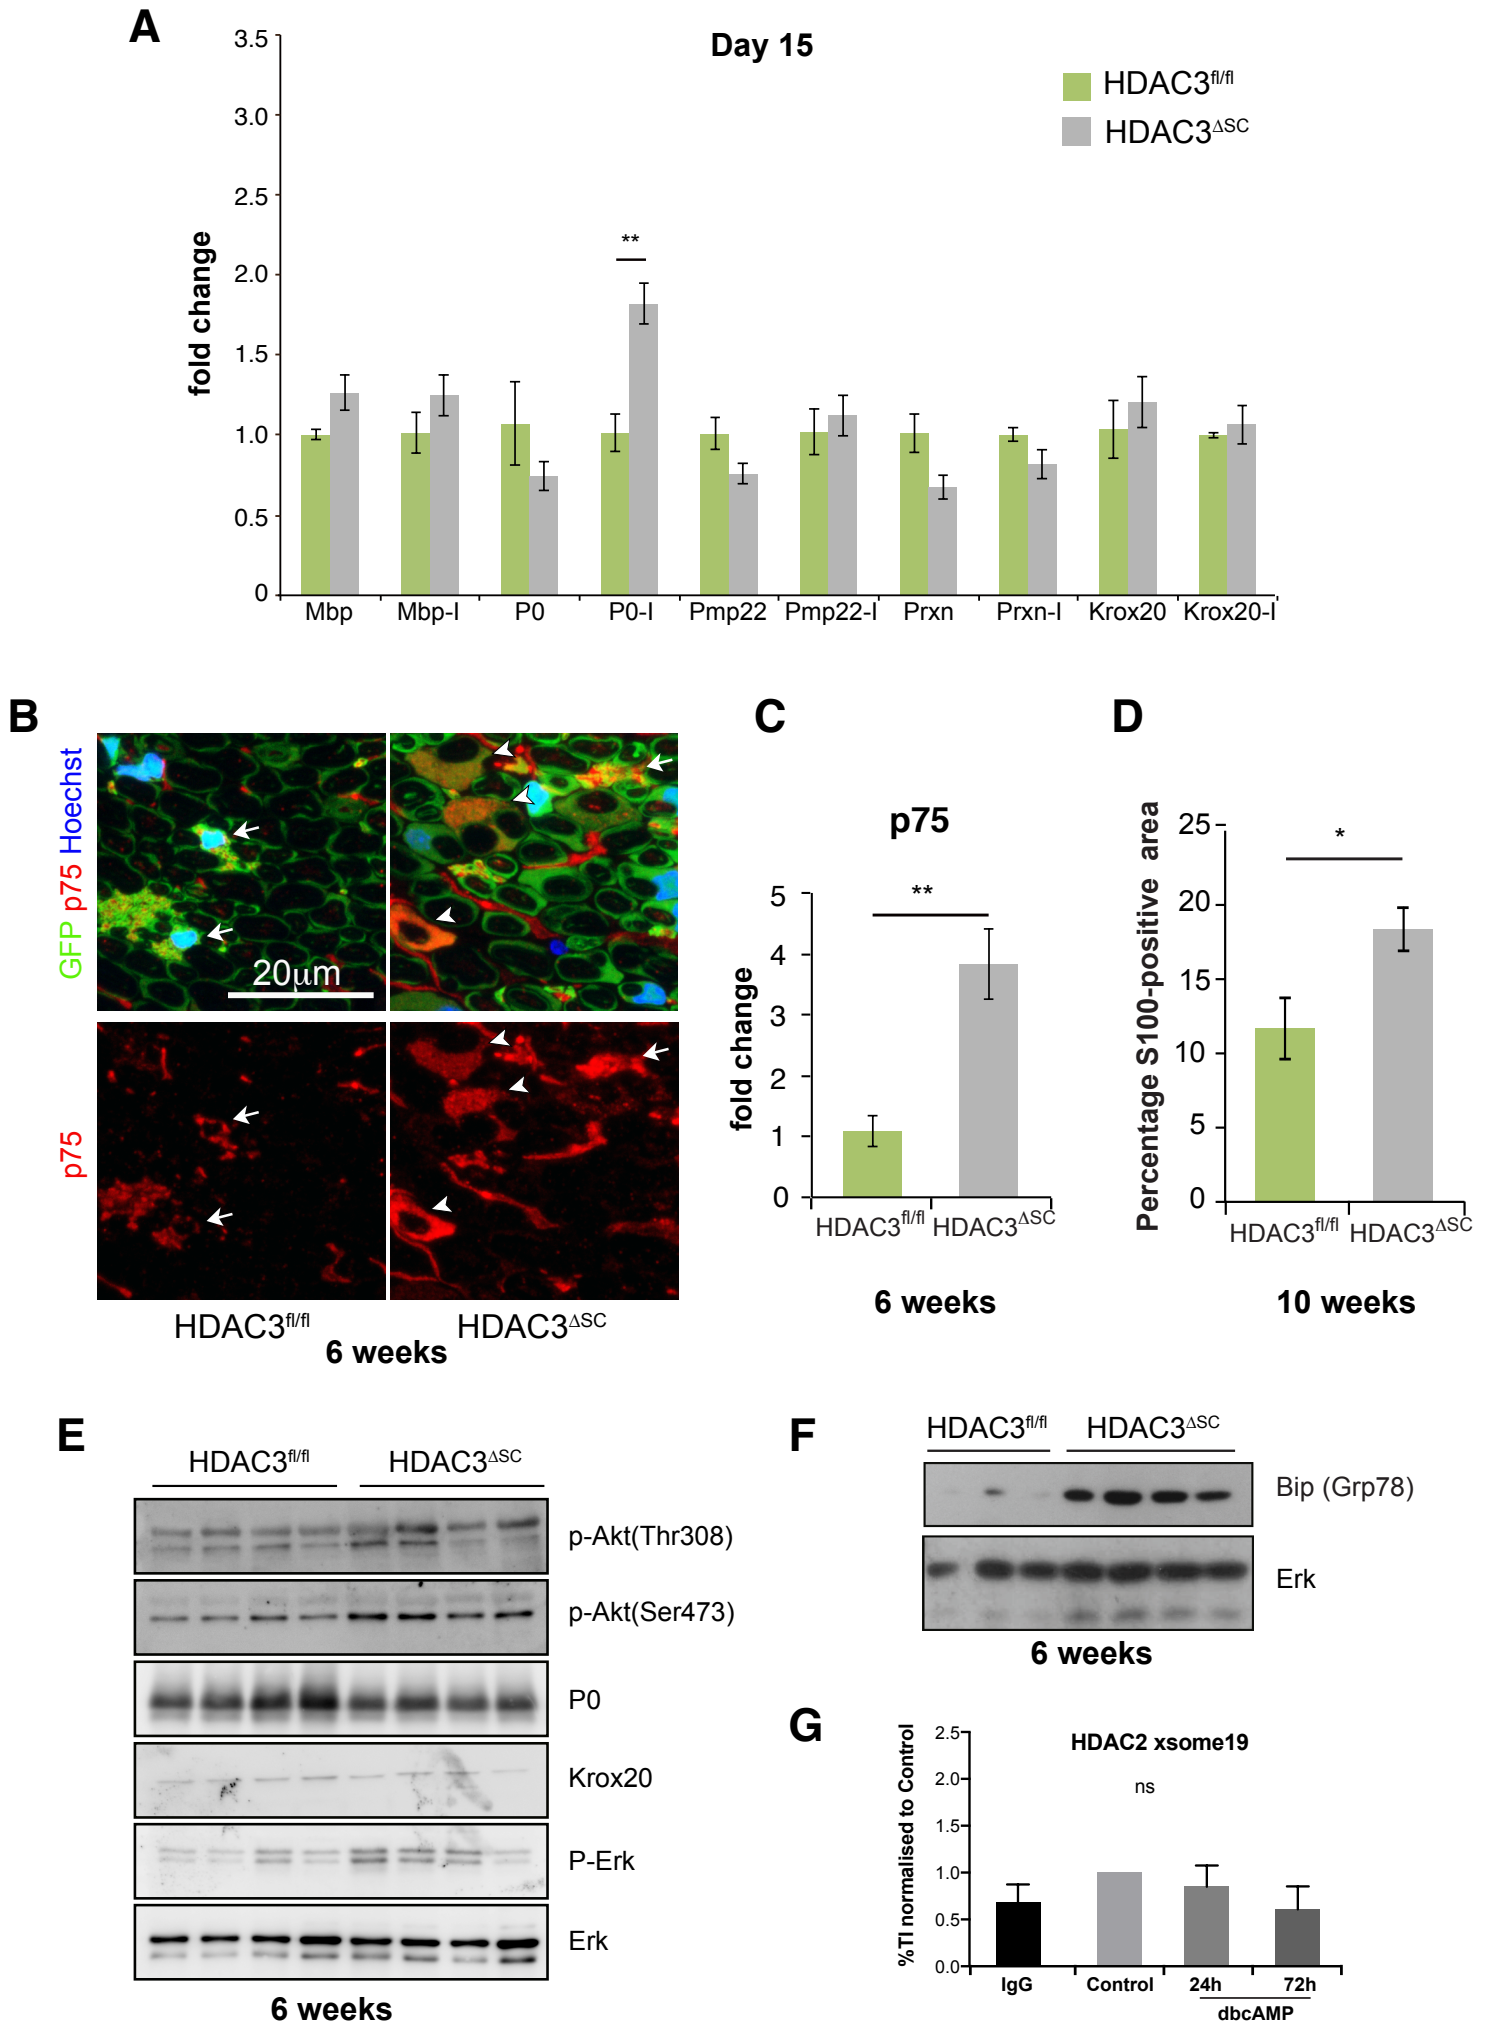

**Supplementary Figure 6. Myelinating Schwann cells lacking HDAC3 remain in the biogenic state, related to Figure 7.** A) RT-qPCR analysis of key myelin genes and the Krox-20 transcription factor in postnatal Day 15 HDAC3<sup>fl/fl</sup> and mutant HDAC3<sup>ASC</sup> mice. Graph shows the mRNA or nascent pre-mRNA (-I) levels of mutant sciatic nerves relative to the controls (n = 3 for HDAC3<sup>fl/fl</sup>, n=4 for HDAC3<sup>ASC</sup>, 3 animals were pooled for each sample, mean ± SEM). B). Representative immunofluorescent images of transverse sciatic nerve sections labelled with p75 (red) to identify non-myelinating Schwann cells (arrows) and mSCs that have dedifferentiated (arrowheads) in 6 weeks old plp-eGFP (GFP+ SCs in green) control (HDAC3<sup>fl/fl</sup>) and mutant mice (HDAC3<sup>ASC</sup>). Nuclei were counterstained with Hoechst (blue). C) Graph shows p75 mRNA levels of mutant sciatic nerves relative to the controls at 6 weeks (n = 4 for HDAC3<sup>fl/fl</sup>, n=4 for HDAC3<sup>ASC</sup>, 2 animals were pooled for each sample, mean±SEM) D) Quantification of Figure 7B showing the proportion of S100-positive area in 10 week-old HDAC3<sup>fl/fl</sup> and HDAC3<sup>ASC</sup> animals. Note that the cytoplasm of Schwann cells is significantly enlarged in mSCs lacking HDAC3 (n=3 mean±SEM). E) Western blot analysis of total protein lysates from 4 week-old HDAC3<sup>fl/fl</sup> and mutant HDAC3<sup>ASC</sup> mice showing no changes between the two genotypes in signalling through the ERK or PI-3kinase pathways. F) Western blot analysis of total protein lysates from 6 week-old HDAC3<sup>fl/fl</sup> and HDAC3<sup>ASC</sup> mice showing an upregulation of the molecular chaperone protein BiP/Grp78 in mutant HDAC3<sup>ASC</sup> mice. G) ChIP analysis of HDAC2 on the negative control region (gene desert on Chromosome 19), in NSΔRafER cells cultured with ± dbcAMP for the indicated times (n = 4, mean±SEM). Note that the % total input of each sample was lower than 0.1% indicating there was no binding on this DNA region. \*p<0.05, \*\*p<0.01.

**Table S1 Primer Sequences for qPCR, related to STAR methods**

|                                                                | Forward 5'-3'           | Reverse 5'-3'          |
|----------------------------------------------------------------|-------------------------|------------------------|
| <i>Mouse myelin binding protein (mbp) mRNA</i>                 | gaagctcgtcggactctgag    | ggcggtgacagactccaag    |
| <i>Mouse myelin protein zero (P0) mRNA</i>                     | cggacagggaaatctatgggtgc | tggtagcggccaggtaaaagag |
| <i>Mouse peripheral myelin protein 22 (pmp22) mRNA</i>         | catcgcggtgctagtgttg     | aaggcggatgtggtacagttc  |
| <i>Mouse periaxin (prxn) mRNA</i>                              | tcagcggcttcaacgtagc     | tagctgccggtgagtcctc    |
| <i>Mouse early growth response protein 2 (Krox20) mRNA</i>     | gccaaggccgtagacaaaatc   | ccactccgtcatctggtca    |
| <i>Mouse myelin binding protein (mbp) pre-mRNA</i>             | caaagcgcgaaaagtcccga    | cgtaggatacacagagacctg  |
| <i>Mouse myelin protein zero (P0) pre-mRNA</i>                 | gagattcgggacaatgagggg   | aggaggaggcaaccaaaaca   |
| <i>Mouse peripheral myelin protein 22 (pmp22) pre-mRNA</i>     | tggtgctgcacttcttggcc    | ccttgctcactgtctacccc   |
| <i>Mouse early growth response protein 2 (Krox20) pre-mRNA</i> | atcgcccaaaagtgaacagg    | cctaggcattctccttgccg   |
| <i>Mouse p75 neurotrophine receptor (NTR) mRNA</i>             | acattccgaccgctgatgtt    | gacacagaggccctacacag   |
| <i>Mouse Histone deacetylase 3 (hdac3) mRNA</i>                | aatgtgcccttacgagatgg    | gtagccaccacctcccagta   |
| <i>Mouse beta-2 microglobulin (b2m) mRNA</i>                   | ttctggtgctgtctcactga    | cagtatgttcggcttcccattc |
| <i>Rat myelin protein zero (P0) mRNA</i>                       | ctggtccagtgaatgggtct    | catgtgaaagtccggtgtc    |
| <i>Rat myelin protein zero (P0) pre-mRNA</i>                   | gaccatatttggcaaggggc    | gggtgctgtctcacgtagc    |
| <i>Rat beta-2 microglobulin (b2m) mRNA</i>                     | tgaccgtgatcttctggtg     | attgaggtgggtggaactg    |

**Table S2 Primer Sequences for ChIP, related to STAR methods**

|                            | Forward 5'-3'        | Reverse 5'-3'        |
|----------------------------|----------------------|----------------------|
| <i>P0 enhancer</i>         | gtagttatgagccccagca  | tcaccctctccttggctatc |
| <i>P0 promoter</i>         | tttctgtccctctgcctcac | gtcctgagccagtgaccaa  |
| <i>Xsome19 gene desert</i> | agcctactttcttgcttgc  | atgaagctgggctagcagat |
